# Supplementary material for: Dion–Jacobson-type perovskite KCa2Ta3O10 nanosheets hybridized with g-C3N4 nanosheets for photocatalytic H2 production
Source: Royal Society of Chemistry journal article supplement (doi:10.1039/c8cy00930a), 2018-01-01
Supplement: c8cy00930a1.pdf [file c8cy00930a1.pdf]

Electronic Supplementary Information for

## Dion-Jacobson-type perovskite $\text{KCa}_2\text{Ta}_3\text{O}_{10}$ nanosheets hybridized with g- $\text{C}_3\text{N}_4$ nanosheets for photocatalytic $\text{H}_2$ production

Deli Jiang,<sup>\*a</sup> Wanxia Ma,<sup>a</sup> Yingjie Yao,<sup>a</sup> Peng Xiao,<sup>a</sup> Baowei Wen,<sup>a</sup> Di Li<sup>\*b</sup> and Min Chen<sup>a</sup>

<sup>a</sup> School of Chemistry and Chemical Engineering, Jiangsu University, Zhenjiang 212013, China

<sup>b</sup> Institute for Energy Research, Jiangsu University, Zhenjiang 212013, China

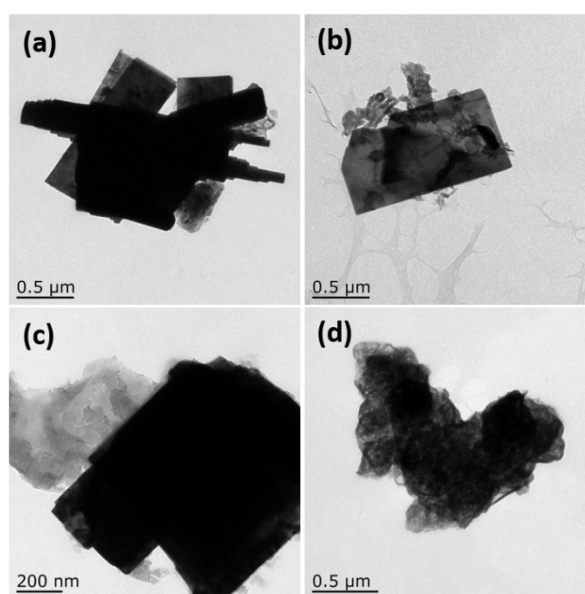

Fig. S1 TEM images of CN/KCTO with different mass ratios: (a) 5%-CN/KCTO, (b) 10%-CN/KCTO, (c) 20%-CN/KCTO, and (d) 40%-CN/KCTO.

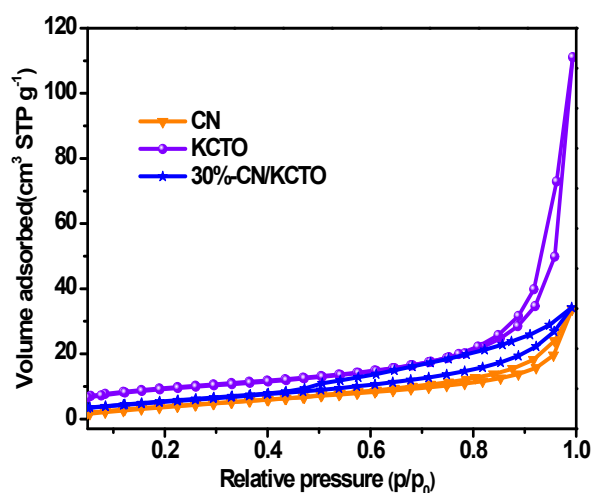

Fig. S2 N<sub>2</sub> adsorption-desorption isotherms curves of the KCTO, CN, and 30%-CN/KCTO heterojunction.
